# Supplementary material for: Changes in Minoxidil Prescribing After Media Attention About Oral Use for Hair Loss
Source: PubMed Central journal article supplement (PMC10170338; doi:10.1001/jamanetworkopen.2023.12477), 2023-05-09
Supplement: jamanetwopen-e2312477-s001.pdf [file jamanetwopen-e2312477-s001.pdf]

## **Data Sharing Statement**

Goodwin Cartwright. Changes in Minoxidil Prescribing After Media Attention About Oral Use for Hair Loss. *JAMA Netw Open*. Published online May 9, 2023. doi:10.1001/jamanetworkopen.2023.12477

### **Data**

**Data available:** No
